# Supplementary material for: Mitofusin-mediated contacts between mitochondria and peroxisomes regulate mitochondrial fusion
Source: PLoS Biol. 2024 Apr 26;22(4):e3002602. doi: 10.1371/journal.pbio.3002602 (PMC11078399; doi:10.1371/journal.pbio.3002602)
Supplement: S1 Data — (XLSX) [file pbio.3002602.s009.xlsx]

## Sheet: 1A-B left
replicate 1					replicate 2					replicate 3
WT	Attached	Detached	total		WT	Attached	Detached	total		WT	Attached	Detached	total
	204	223	427			220	221	441			112	130	242
% Final	47.7752	52.2248			% Final	49.8866	50.1134			% Final	46.281	53.719
Mdm30∆	Attached	Detached	total		Mdm30∆	Attached	Detached	total		Mdm30∆	Attached	Detached	total
	283	224	507			282	230	512			201	167	368
% Final	55.8185	44.1815			% Final	55.0781	44.9219			% Final	54.6196	45.3804
Average
WT	Attached	Detached	total		Mdm30∆	Attached	Detached	total
	178.667	191.333	370			255.333	207	462.333
	47.9809	52.0191				55.1721	44.8279
	1.47916	1.47916	SD			0.493967	0.493967	SD
	0.853996	0.853996	SEM			0.285192	0.285192	SEM
Analyse de variance: un facteur			Attached WT vs Delta			p=	0.00285505
RAPPORT DÉTAILLÉ
Groupes	Nombre d'échantillons	Somme	Moyenne	Variance
Colonne 1	3	143.943	47.9809	3.28189
Colonne 2	3	165.516	55.1721	0.366005
ANALYSE DE VARIANCE
Source des variations	Somme des carrés	Degré de liberté	Moyenne des carrés	F	Probabilité	Valeur critique pour F
Entre Groupes	77.5689	1	77.5689	42.528	0.00285505	7.70865				Anova
A l'intérieur des groupes	7.29579	4	1.82395							**P<0.05, ***P<0.005
Total	84.8647	5

## Sheet: 1A-B right
replicate 1					replicate 2					replicate 3
WT	Attached	Detached	total		WT	Attached	Detached	total		WT	Attached	Detached	total
	397	83	480			266	60	326			155	30	185
% Final	82.7083	17.2917			% Final	81.5951	18.4049			% Final	83.7838	16.2162
Mdm30∆	Attached	Detached	total		Mdm30∆	Attached	Detached	total		Mdm30∆	Attached	Detached	total
	513	38	551			291	22	313			112	3	115
% Final	93.1034	6.89655			% Final	92.9712	7.02875			% Final	97.3913	2.6087
Average
WT	Attached	Detached	total		Mdm30∆	Attached	Detached	total
	818	173	991			916	63	979
% Final	82.5429	17.4571			% Final	93.5649	6.43514
	0.896836	0.896836	SD			2.1045	2.1045	SD
	0.517789	0.517789	SEM			1.21503	1.21503	SEM
Analyse de variance: un facteur			Attached WT vs Delta
RAPPORT DÉTAILLÉ						p=	0.00173584
Groupes	Nombre d'échantillons	Somme	Moyenne	Variance
Colonne 1	3	248.087	82.6957	1.19771
Colonne 2	3	283.466	94.4887	6.32335
ANALYSE DE VARIANCE
Source des variations	Somme des carrés	Degré de liberté	Moyenne des carrés	F	Probabilité	Valeur critique pour F
Entre Groupes	208.61	1	208.61	55.4735	0.00173584	7.70865				Anova
A l'intérieur des groupes	15.0421	4	3.76053							**P<0.05, ***P<0.005
Total	223.652	5

## Sheet: 1F
	Replicate 1					Replicate 2					Replicate 3
	Green (+Red)	Total B GFP	% Green (specific)	total beads		Green (+Red)	Total B GFP	% Green (specific)	total beads		Green (+Red)	Total B GFP	% Green (specific)	total beads		Average Green	SD	SEM
WT fzo GFP -	0	0	0	54		0	1	0	61		0	0	0	45		0	0	0
WT fzo GFP +	0	23	0	55		0	51	0	81		0	28	0	76		0	0	0
WT Pex3mcherry -	0	0	0	54		0	3	0	66		0	0	0	51		0	0	0
WT Pex3mcherry +	0	52	0	89		0	26	0	58		0	25	0	95		0	0	0
WT Triple -	0	0	0	44		0	0	0	59		0	0	0	48		0	0	0
WT Triple +	16	43	37.2093	69		14	47	29.7872	76		12	77	15.5844	100		27.527	8.97183	5.17989
Delta Fzo GFP -	0	0	0	57		0	1	0	82		0	0	0	53		0	0	0
Delta Fzo GFP +	0	28	0	59		0	29	0	70		0	26	0	101		0	0	0
Delta Pex3mcherry -	0	0	0	52		0	1	0	67		0	0	0	35		0	0	0
Delta Pex3mcherry +	0	40	0	59		0	24	0	58		0	21	0	76		0	0	0
Delta Triple -	0	0	0	59		0	2	0	56		0	1	0	43		0	0	0
Delta Triple +	22	49	44.898	76		34	52	65.3846	79		15	65	23.0769	114		44.4532	17.2749	9.97367
	Red	Total Red	% Red (Specific)	total beads		Red	Total Red	% Red (Specific)	total beads		Red	Total Red	% Red (Specific)	total beads		Average Red	SD	SEM
WT fzo GFP -	0	0	0	54		0	0	0	61		0	0	0	45		0	0	0
WT fzo GFP +	0	0	0	55		0	0	0	81		0	0	0	76		0	0	0
WT Pex3mcherry -	0	0	0	54		0	0	0	66		0	0	0	51		0	0	0
WT Pex3mcherry +	83	89	93.2584	89		58	58	100	58		88	95	92.6316	95		95.2967	3.33559	1.9258
WT Triple -	0	0	0	44		0	0	0	59		0	0	0	48		0	0	0
WT Triple +	69	69	100	69		74	76	97.3684	76		100	100	100	100		99.1228	1.24054	0.716225
Delta Fzo GFP -	0	0	0	57		0	0	0	82		0	0	0	53		0	0	0
Delta Fzo GFP +	0	0	0	59		0	0	0	70		0	0	0	101		0	0	0
Delta Pex3mcherry -	0	0	0	52		0	0	0	67		0	0	0	35		0	0	0
Delta Pex3mcherry +	59	59	100	59		58	58	100	58		76	76	100	76		100	0	0
Delta Triple -	0	0	0	59		0	0	0	56		0	0	0	43		0	0	0
Delta Triple +	50	76	65.7895	76		79	79	100	79		104	114	91.2281	114		85.6725	14.5083	8.3764
	Blue	Total Blue	% Blue (Specific)	total beads		Blue	Total Blue	% Blue (Specific)	total beads		Blue	Total Blue	% Blue (Specific)	total beads		Average Blue	SD	SEM
WT fzo GFP -	0	0	0	54		0	6	0	61		0	0	0	45		0	0	0
WT fzo GFP +	0	32	0	55		0	45	0	81		0	28	0	76		0	0	0
WT Pex3mcherry -	0	0	0	54		0	3	0	66		0	0	0	51		0	0	0
WT Pex3mcherry +	0	37	0	89		0	32	0	58		0	25	0	95		0	0	0
WT Triple -	0	0	0	44		0	2	0	59		0	1	0	48		0	0	0
WT Triple +	0	26	0	69		0	34	0	76		0	23	0	100		0	0	0
Delta Fzo GFP -	0	0	0	57		0	6	0	82		0	2	0	53		0	0	0
Delta Fzo GFP +	0	30	0	59		0	29	0	70		0	26	0	101		0	0	0
Delta Pex3mcherry -	0	0	0	52		0	2	0	67		0	0	0	35		0	0	0
Delta Pex3mcherry +	0	18	0	59		0	25	0	58		0	21	0	76		0	0	0
Delta Triple -	0	0	0	59		0	4	0	56		0	1	0	43		0	0	0
Delta Triple +	0	27	0	76		0	34	0	79		0	39	0	114		0	0	0

## Sheet: 1G-H
	replicate 1				replicate 2				Replicate 3 -TX				replicate 3 +TX			substraction -TX
	Green	count of beads			Green	count of beads			Green	count of beads	total beads		Green	count of beads		Green
WT triple	3.2343	43			3.87395	44			1.02423	66	153		0.727623	53		0.0279416
D triple	5.03512	43			5.09133	48			1.38138	65	156		0.725128	47		0.170099
	Background				Background				Background -TX				Background +TX			substraction +TX
	Green	count of beads			Green	total beads			Green	count of beads			Green	count of beads		Green
WT triple	3.14581	34			4.05371	35			0.996286	49			1.60887	31		-0.881248
D triple	4.82504	25			4	53			1.21129	42			1.14932	75		-0.424192
	substraction				substraction				substraction				substraction			WT	D	ratio
	Green				Green				Green				Green			0.164266	1	5.87893	no TX
WT triple	0.0884899				0				0.0279416				-0.881248			0	0	0	with TX
D triple	0.210085				1.09133				0.170099				-0.424192
	WT	Delta MDM30	ratio		WT	Delta MDM30	ratio		WT	Delta MDM30	ratio						triton control exp
	0.42121	1	4.75998		0	1	0.916317		0.164266	1	5.87893
																	WT	0	-
																	Delta MDM30	0	-
Anova: Single Factor								WT	Delta MDM30								WT	0.164266	+
								0.195159	1	Average							Delta MDM30	1	+
SUMMARY								WT	Delta MDM30
Groups	Count	Sum	Average	Variance				0.212297	0	SD
Column 1	3	0.585476	0.195159	0.0450702				0.12257	0	SEM
Column 2	3	3	1	0
								p=	0.002783
ANOVA
Source of Variation	SS	df	MS	F	P-value	F crit
Between Groups	0.971654	1	0.971654	43.1173	0.002783	7.70865
Within Groups	0.0901404	4	0.0225351					Anova
								**P<0.05, ***P<0.005
Total	1.06179	5

## Sheet: 2B left
	Replicate 1						Replicate 2						Replicate 2						Average Green	SD	SEM
	Green (+Red)	Total B GFP	% Green (specific)	total beads		Souche	Green (+Red)	Total B GFP	% Green (specific)	total beads		Souche	Green (+Red)	Total B GFP	% Green (specific)	total beads			GFP
mtBFP S201N GFP mock	0	0	0	100		mtBFP S201N GFP mock	0	0	0	100		mtBFP S201N GFP mock	0	0	0	100		mtBFP S201N mock	0	0	0
mtBFP S201N GFP +	0	10	0	59		mtBFP S201N GFP +	0	15	0	72		mtBFP S201N GFP +	0	3	0	72		mtBFP S201N +	0	0	0
mtBFP Fzo-GFP mock	0	0	0	100		mtBFP Fzo-GFP mock	0	0	0	100		mtBFP Fzo-GFP mock	0	0	0	100		mtBFP Fzo-GFP mock	0	0	0
mtBFP Fzo-GFP +	0	15	0	74		mtBFP Fzo-GFP +	0	10	0	51		mtBFP Fzo-GFP +	0	33	0	103		mtBFP Fzo-GFP +	0	0	0
WT Triple mock	0	0	0	100		WT Triple mock	0	0	0	100		WT Triple mock	0	0	0	100		WT Triple mock	0	0	0
WT Triple +	10	39	25.641	98		WT Triple +	9	28	32.1429	84		WT Triple +	8	48	16.6667	100		WT Triple +	24.8168	6.34495	3.66326
S201N Triple mock	0	0	0	100		S201N Triple mock	0	0	0	100		S201N Triple mock	0	0	0	100		S201N Triple mock	0	0	0
S201N Triple +	10	32	31.25	72		S201N Triple +	9	21	42.8571	57		S201N Triple +	10	37	27.027	61		S201N Triple +	33.7114	6.69288	3.86414
	Red	Total Red	% Red (Specific)	total beads		Souche	Red	Total Red	% Red (Specific)	total beads		Souche	Red	Total Red	% Red (Specific)	total beads			Average Red	SD	SEM
mtBFP S201N GFP mock	0	0	0	100		mtBFP S201N GFP mock	0	0	0	100		mtBFP S201N GFP mock	0	0	0	100		mtBFP S201N mock	0	0	0
mtBFP S201N GFP +	0	0	0	59		mtBFP S201N GFP +	0	0	0	72		mtBFP S201N GFP +	0	0	0	72		mtBFP S201N +	0	0	0
mtBFP Fzo-GFP mock	0	0	0	100		mtBFP Fzo-GFP mock	0	0	0	100		mtBFP Fzo-GFP mock	0	0	0	100		mtBFP Fzo-GFP mock	0	0	0
mtBFP Fzo-GFP +	0	0	0	74		mtBFP Fzo-GFP +	0	0	0	51		mtBFP Fzo-GFP +	0	0	0	103		mtBFP Fzo-GFP +	0	0	0
WT Triple mock	0	0	0	100		WT Triple mock	0	0	0	100		WT Triple mock	0	0	0	100		WT Triple mock	0	0	0
WT Triple +	96	96	100	98		WT Triple +	83	83	100	84		WT Triple +	79	79	100	100		WT Triple +	100	0	0
S201N Triple mock	0	0	0	100		S201N Triple mock	0	0	0	100		S201N Triple mock	0	0	0	100		S201N Triple mock	0	0	0
S201N Triple +	72	72	100	72		S201N Triple +	57	57	100	57		S201N Triple +	52	52	100	61		S201N Triple +	100	0	0
	Blue	Total Blue	% Blue (Specific)	total beads		Souche	Blue	Total Blue	% Blue (Specific)	total beads		Souche	Blue	Total Blue	% Blue (Specific)	total beads			Average Blue	SD	SEM
mtBFP S201N GFP mock	0	0	0	100		mtBFP S201N GFP mock	0	0	0	100		mtBFP S201N GFP mock	0	0	0	100		mtBFP S201N mock	0	0	0
mtBFP S201N GFP +	0	10	0	59		mtBFP S201N GFP +	0	15	0	72		mtBFP S201N GFP +	0	3	0	72		mtBFP S201N +	0	0	0
mtBFP Fzo-GFP mock	0	0	0	100		mtBFP Fzo-GFP mock	0	0	0	100		mtBFP Fzo-GFP mock	0	0	0	100		mtBFP Fzo-GFP mock	0	0	0
mtBFP Fzo-GFP +	0	15	0	74		mtBFP Fzo-GFP +	0	9	0	51		mtBFP Fzo-GFP +	0	33	0	103		mtBFP Fzo-GFP +	0	0	0
WT Triple mock	0	0	0	100		WT Triple mock	0	0	0	100		WT Triple mock	0	0	0	100		WT Triple mock	0	0	0
WT Triple +	0	29	0	98		WT Triple +	0	19	0	84		WT Triple +	0	40	0	100		WT Triple +	0	0	0
S201N Triple mock	0	0	0	100		S201N Triple mock	0	0	0	100		S201N Triple mock	0	0	0	100		S201N Triple mock	0	0	0
S201N Triple +	0	22	0	72		S201N Triple +	0	13	0	57		S201N Triple +	0	27	0	61		S201N Triple +	0	0	0

## Sheet: 2B right
	replicate 1			replicate 2			replicate 3			average 3Ns
	Green	count of beads		Green	count of beads		Green	count of beads		Green	total beads
WT triple	0.13	47		0.23	54		0.608	50		0.324	151
S201N triple	1.93	27		2.07	48		2.864	35		2.289	110
	12.11.2019 Pex3 mcherry			13.12.2019 Pex3 mcherry			28.11.2019 Pex3mcherry			average 3Ns
	Green	count of beads		Green	count of beads		Green	count of beads		Green	total beads
WT double	0.108	30		0.13	47		0.5	58		0.079	135
S201N double	0.29	47		0.5	40		1.56	34		1.508	121
	Substracted			Substracted			Substracted
	Green			Green			Green
WT	0.022			0.1			0.108
S201N	1.64			1.57			1.304
WT	0.0124277	ratio 1/S201N		0.0684739	ratio 1/S201N		0.0837648	ratio 1/S201N
S201N	1	0.608728		1	0.634461		1	0.766844
Average	0.0548888	1
SD	0.0375587	0
SEM	0.02	0					**P<0.05, ***P<0.005 (ANOVA).
p=	1.65691e-06
				WT	S201N		Anova: Single Factor
				0.0124277	1
				0.0684739	1		SUMMARY
Anova				0.0837648	1		Groups	Count	Sum	Average	Variance
**P<0.05, ***P<0.005							Column 1	3	0.164666	0.0548888	0.00141066
							Column 2	3	3	1	0
							ANOVA
							Source of Variation	SS	df	MS	F	P-value	F crit
							Between Groups	1.33985	1	1.33985	1899.61	1.65691e-06	7.70865
							Within Groups	0.00282	4	0.00070533
							Total	1.34267	5

## Sheet: 2C
	Replicate 1				Replicate 2				Replicate 3				Averages
					WT				WT				WT
	Attached	Detached	total		Attached	Detached	total		Attached	Detached	total		Attached	Detached	total %
WT	160	170	330		109	143	252		113	111	224		47.3951	52.6049	100
	48.4848	51.5152	1		43.254	56.746	1		50.4464	49.5536	1		3.71801	3.71801	SD
													2.14659	2.14659	SEM
					S201N				S201N
	Attached	Detached	total		Attached	Detached	total		Attached	Detached	total		S201N
S201N	169	322	491		136	219	355		75	151	226		Attached	Detached	total %
	34.4196	65.5804	1		38.3099	61.6901	1		33.1858	66.8142	1		35.3051	64.6949	100
													2.67433	2.67433	SD
					Mgm1D				Mgm1D				1.54402	1.54402	SEM
	Attached	Detached	total		Attached	Detached	total		Attached	Detached	total
Mgm1D	67	53	120		49	61	110		63	68	131		Mgm1D
	55.8333	44.1667	1		44.5455	55.4545	1		48.0916	51.9084	1		Attached	Detached	total %
													49.4901	50.5099	100
													5.53813	5.53813	SD
													3.19744	3.19744	SEM
Analyse de variance: un facteur			attached WT/Mgm1					Anova: Single Factor		attached WT/S201N
RAPPORT DÉTAILLÉ								SUMMARY							Anova
Groupes	Nombre d'échantillons	Somme	Moyenne	Variance				Groups	Count	Sum	Average	Variance			**P<0.05, ***P<0.005
Colonne 1	3	142.185	47.3951	13.8236				Column 1	3	142.185	47.3951	13.8236
Colonne 2	3	148.596	49.5321	30.6709				Column 2	3	105.915	35.3051	7.15202
ANALYSE DE VARIANCE								ANOVA
Source des variations	Somme des carrés	Degré de liberté	Moyenne des carrés	F	Probabilité	Valeur critique pour F		Source of Variation	SS	df	MS	F	P-value	F crit
Entre Groupes	6.84997	1	6.84997	0.307902	0.608535	7.70865		Between Groups	219.252	1	219.252	20.9055	0.0102433	7.70865
A l'intérieur des groupes	88.9889	4	22.2472					Within Groups	41.9512	4	10.4878
Total	95.8389	5						Total	261.203	5

## Sheet: 2E
Serie Mélanges WT/Pex34D
N=1							N=2
Souche	Mitos attachées	Nombre de billes rouges	Total billes	% mitos	normalisation/100		Souche	Mitos attachées	Nombre de billes rouges	Total billes	% mitos	normalisation/100
1847+WT Fzo1	6	177	177	3.38983	59.0278		1847+WT Fzo1	7	160	160	4.375	58.7097
1842+WT Fzo1	4	0	170	2.35294	40.9722		1842+WT Fzo1	4	0	130	3.07692	41.2903
total				5.74277			total				7.45192
1847+S201N Fzo1	4	108	108	3.7037	49.0566		1847+S201N Fzo1	5	141	141	3.5461	51.0417
1842+S201N Fzo1	7	0	182	3.84615	50.9434		1842+S201N Fzo1	5	0	147	3.40136	48.9583
total				7.54986			total				6.94746
1847+WT Fzo1 Pex34D	8	175	175	4.57143	78.0976		1847+WT Fzo1 Pex34D	8	179	179	4.46927	68.8696
1842+WT Fzo1 Pex34D	2	0	156	1.28205	21.9024		1842+WT Fzo1 Pex34D	4	0	198	2.0202	31.1304
total				5.85348			total				6.48948
1847+S201N Fzo1 Pex34D	4	108	108	3.7037	62.3256		1847+S201N Fzo1 Pex34D	5	163	163	3.06748	62.3557
1842+S201N Fzo1 Pex34D	3	0	134	2.23881	37.6744		1842+S201N Fzo1 Pex34D	4	0	216	1.85185	37.6443
total				5.94251			total				4.91934
N=3							Moyenne 3N
Souche	Mitos attachées	Nombre de billes rouges	Total billes	% mitos	normalisation/100		Souche	Mitos attachées	Nombre de billes rouges	Total billes	% mitos	normalisation/100		SD	SEM	Substraction
1847+WT Fzo1	5	133	133	3.7594	58.6636		1847+WT Fzo1	6	156.667	156.667	3.82979	59.0057		0.198314	0.114497	18.01
1842+WT Fzo1	4	0	151	2.64901	41.3364		1842+WT Fzo1	4	0	150.333	2.66075	40.9943		0.198314	0.114497
total				6.40841			total				6.49054
1847+S201N Fzo1	5	152	152	3.28947	50.4886		1847+S201N Fzo1	4.66667	133.667	133.667	3.49127	49.71		1.02445	0.591466	-0.58
1842+S201N Fzo1	4	0	124	3.22581	49.5114		1842+S201N Fzo1	5.33333	0	151	3.53201	50.29		1.02445	0.591466
total				6.51528			total				7.02328
1847+WT Fzo1 Pex34D	10	171	171	5.84795	69.8413		1847+WT Fzo1 Pex34D	8.66667	175	175	4.95238	71.3072		5.07064	2.92754	42.61
1842+WT Fzo1 Pex34D	5	0	198	2.52525	30.1587		1842+WT Fzo1 Pex34D	3.66667	0	184	1.99275	28.6928		5.07064	2.92754
total				8.37321			total				6.94513
1847+S201N Fzo1 Pex34D	5	148	148	3.37838	63.8731		1847+S201N Fzo1 Pex34D	4.66667	139.667	139.667	3.34129	62.8809		0.884887	0.51089	25.76
1842+S201N Fzo1 Pex34D	3	0	157	1.91083	36.1269		1842+S201N Fzo1 Pex34D	3.33333	0	169	1.97239	37.1191		0.884887	0.51089
total				5.28921			total				5.31368
					Analyse de variance: un facteur	WT vs S201N	***						Analyse de variance: un facteur	WT vs Pex34 WT	**
					RAPPORT DÉTAILLÉ								RAPPORT DÉTAILLÉ
					Groupes	Nombre d'échantillons	Somme	Moyenne	Variance				Groupes	Nombre d'échantillons	Somme	Moyenne	Variance
					Colonne 1	3	176.401	58.8003	0.0393284				Colonne 1	3	176.401	58.8003	0.0393284
					Colonne 2	3	150.587	50.1956	1.04949				Colonne 2	3	216.808	72.2695	25.7114
					ANALYSE DE VARIANCE								ANALYSE DE VARIANCE
					Source des variations	Somme des carrés	Degré de liberté	Moyenne des carrés	F	Probabilité	Valeur critique pour F		Source des variations	Somme des carrés	Degré de liberté	Moyenne des carrés	F	Probabilité	Valeur critique pour F
					Entre Groupes	111.062	1	111.062	204.003	0.000139578	7.7086		Entre Groupes	272.127	1	272.127	21.1354	0.0100511	7.70865
					A l'intérieur des groupes	2.17765	4	0.544412					A l'intérieur des groupes	51.5015	4	12.8754
					Total	113.239	5						Total	323.628	5
					Analyse de variance: un facteur	Pex34 WT vs Pex34 S201N	**						Analyse de variance: un facteur	S201N vs Pex34 S201N	***
	Anova single factor	**P<0.05, ***P<0.005
					RAPPORT DÉTAILLÉ								RAPPORT DÉTAILLÉ
					Groupes	Nombre d'échantillons	Somme	Moyenne	Variance				Groupes	Nombre d'échantillons	Somme	Moyenne	Variance
					Colonne 1	3	216.808	72.2695	25.7114				Colonne 1	3	150.587	50.1956	1.04949
					Colonne 2	3	188.554	62.8514	0.783025				Colonne 2	3	188.554	62.8514	0.783025
					ANALYSE DE VARIANCE								ANALYSE DE VARIANCE
					Source des variations	Somme des carrés	Degré de liberté	Moyenne des carrés	F	Probabilité	Valeur critique pour F		Source des variations	Somme des carrés	Degré de liberté	Moyenne des carrés	F	Probabilité	Valeur critique pour F
					Entre Groupes	133.049	1	133.049	10.0436	0.0338851	7.7086		Entre Groupes	240.254	1	240.254	262.212	8.5091e-05	7.70865
					A l'intérieur des groupes	52.9889	4	13.2472					A l'intérieur des groupes	3.66504	4	0.91626
					Total	186.038	5						Total	243.919	5

## Sheet: 3A
Replicate 1	WT	Cyc	TEF					Analyse de variance: un facteur			CYC
fzo	100	63	81
PGK	100	76	61					RAPPORT DÉTAILLÉ
Fzo/PGK	100	82.8947	132.787					Groupes	Nombre d'échantillons	Somme	Moyenne	Variance
								Colonne 1	4	400	100	0
Replicate 2	WT	Cyc						Colonne 2	4	263.521	65.8803	466.467
Fzo	100	39
PGK	100	75.3
Fzo/PGK	100	51.7928						ANALYSE DE VARIANCE
								Source des variations	Somme des carrés	Degré de liberté	Moyenne des carrés	F	Probabilité	Valeur critique pour F
Replicate 3	WT	Cyc	TEF		Anova			Entre Groupes	2328.31	1	2328.31	9.98276	0.0195762	5.98738
fzo	100	84	200		**P<0.05, ***P<0.005			A l'intérieur des groupes	1399.4	6	233.233
PGK	100	98	117
Fzo/PGK	100	85.7143	170.94					Total	3727.71	7
Replicate 4	WT	Cyc	tef
Fzo1	100	47	158					Analyse de variance: un facteur			TEF
pgk	100	109	72
Fzo1/PGK	100	43.1193	219.444					RAPPORT DÉTAILLÉ
								Groupes	Nombre d'échantillons	Somme	Moyenne	Variance
Averages	WT	Cyc	Tef					Colonne 1	3	300	100	0
fzo	100	58.25	146.333					Colonne 2	3	523.172	174.391	1886.31
PGK	100	89.575	83.3333
Fzo/PGK	100	65.0293	175.6
								ANALYSE DE VARIANCE
	WT	Cyc	tef					Source des variations	Somme des carrés	Degré de liberté	Moyenne des carrés	F	Probabilité	Valeur critique pour F
SD	0	21.5978	43.4317					Entre Groupes	8300.92	1	8300.92	8.80122	0.0412797	7.70865
SEM	0	10.7989	25.0753					A l'intérieur des groupes	3772.62	4	943.156
p=		0.0195762	0.0412797
								Total	12073.5	5

## Sheet: 3E
N=1	Attached	Detached	Total		N=2	Attached	Detached	Total		N=3	Attached	Detached	Total
1861 (Ole1D+Ole1 prom Endo)	125	145	270		1861 (Ole1D+Ole1 prom Endo)	170	194	364		1861 (Ole1D+Ole1 prom Endo)	149	133	282
%	46.2963	53.7037			%	46.7033	53.2967			%	52.8369	47.1631
1863 (Ole1D+Ole1 prom Cyc)	102	166	268		1863 (Ole1D+Ole1 prom Cyc)	146	224	370		1863 (Ole1D+Ole1 prom Cyc)	101	154	255
%	38.0597	61.9403			%	39.4595	60.5405			%	39.6078	60.3922
1865(Ole1D+Ole1 prom TEF)	218	152	370		1865(Ole1D+Ole1 prom TEF)	232	163	395		1865(Ole1D+Ole1 prom TEF)	215	155	370
%	58.9189	41.0811			%	58.7342	41.2658			%	58.1081	41.8919
averages
	Attached	Detached	SD	SEM
Ole1D + Ole1 prom Ole1	148	157.333
%	48.6122	51.3878	3.66437	2.11563
Ole1D + Ole1 prom Cyc	116.333	181.333
%	39.0423	60.9577	0.854213	0.49318	p=0.0084
Ole1D + Ole1 prom TEF	221.667	156.667
%	58.5871	41.4129	0.424952	0.245346	p=0.0085
Anova	single factor
**P<0.05, ***P<0.005
Analyse de variance: un facteur			WT/CYC
RAPPORT DÉTAILLÉ
Groupes	Nombre d'échantillons	Somme	Moyenne	Variance
Colonne 1	3	146.836	48.9455	11.8521
Colonne 2	3	117.127	39.0423	0.72968
ANALYSE DE VARIANCE
Source des variations	Somme des carrés	Degré de liberté	Moyenne des carrés	F	Probabilité	Valeur critique pour F
Entre Groupes	147.109	1	147.109	23.3844	0.00842606	7.70865
A l'intérieur des groupes	25.1635	4	6.29089
Total	172.272	5
Total	598.554	8
Analyse de variance: un facteur			WT/TEF
RAPPORT DÉTAILLÉ
Groupes	Nombre d'échantillons	Somme	Moyenne	Variance
Colonne 1	3	146.836	48.9455	11.8521
Colonne 2	3	175.761	58.5871	0.180584
ANALYSE DE VARIANCE
Source des variations	Somme des carrés	Degré de liberté	Moyenne des carrés	F	Probabilité	Valeur critique pour F
Entre Groupes	139.44	1	139.44	23.1769	0.00855884	7.70865
A l'intérieur des groupes	24.0654	4	6.01634
Total	163.505	5

[truncated: 20 more sheets: 3F, 3G, 3H, 5B, 5D, 6A, 6B, 6C, 6D, 7A-B, 7C , S1A, S2C, S2D, S3F, S5A, S5B, S5C, S5 D-E, S6B]
